# Supplementary material for: Prevention of respiratory syncytial virus infection with probiotic lactic acid bacterium Lactobacillus gasseri SBT2055
Source: PubMed Central journal article supplement (PMC6423325; doi:10.1038/s41598-019-39602-7), 2019-03-18
Supplement: 41598_2019_39602_MOESM1_ESM.pdf [file 41598_2019_39602_MOESM1_ESM.pdf]

## Supplementary Information

### **Prevention of respiratory syncytial virus infection with probiotic lactic acid bacterium *Lactobacillus gasseri* SBT2055**

Kei Eguchi<sup>1#</sup>, Naoki Fujitani<sup>2#</sup>, Hisako Nakagawa<sup>2</sup>, and Tadaaki Miyazaki<sup>2\*</sup>

<sup>1</sup>Milk Science Research Institute, Megmilk Snow Brand Co., Ltd., 1-2, Minamidai, 1-chome, Kawagoe, Saitama 350-1165, Japan

<sup>2</sup>Department of Probiotics Immunology, Institute for Genetic Medicine, Hokkaido University, N15W7, Kita-ku, Sapporo 060-0815, Japan

#Contributed equally to this work

\*To whom correspondence should be addressed:

Tadaaki Miyazaki, Ph.D., Department of Probiotics Immunology, Institute for Genetic Medicine Hokkaido University, N15, W7 Kita-ku, Sapporo, Japan.

E-mail: [miyazaki@igm.hokudai.ac.jp](mailto:miyazaki@igm.hokudai.ac.jp)

Phone and fax: +81-11-706-9085

**Table S1 qPCR primer list used in this study**

| gene name      | sense                          | antisense                     |
|----------------|--------------------------------|-------------------------------|
| <i>RSV-F</i>   | GGAACAAGTTGTTGAGGTTTATGAATATGC | TTCTGCTGTCAAGTCTAGTACACTGTAGT |
| <i>Rpl19</i>   | ATGAGTATGCTCAGGCTACAGA         | GCATTGGCGATTTTCATTGGTC        |
| <i>HIST1H4</i> | TCCTGGAGAATGTGATACGG           | TTGAGCGCGTAGACAACATC          |
| <i>IFN-β</i>   | TCCAGCACTGGGTGGAATGA           | GGTACCTTTGCACCCTCCAG          |
| <i>IFN-γ</i>   | CTGCAGAGCCAGATTATCTC           | CCTGTGGGTTGTTGACCTCA          |
| <i>Oas1a</i>   | GAAGAGGCTGATGTGTGGCT           | TGTCCAGTTCTCTTCTACCTGC        |
| <i>Mx1</i>     | CCAACTGGAATCCTCCTGGAA          | GCCGCACCTTCTCCTCATAG          |
| <i>ISG15</i>   | GAGCTAGAGCCTGCAGCAAT           | TTCTGGGCAATCTGCTTCTT          |
| <i>SRCAP</i>   | CTCCACTGCTACCTCGTTTGGT         | GGAAAATCCGTTCCAGGCGTTC        |
| <i>GAPDH</i>   | GTCTCCTCTGACTTCAACAGCG         | ACCACCCTGTTGCTGTAGCCAA        |

**Table S2 up- and down-regulated proteins by addition of LG2055 water-soluble fraction**

| Protein names                                                                                                        | Gene names           | Log2-foi |
|----------------------------------------------------------------------------------------------------------------------|----------------------|----------|
| E3 ubiquitin-protein ligase MYCBP2                                                                                   | MYCBP2               | -4.504   |
| Helicase SRCAP                                                                                                       | SRCAP                | -4.487   |
| Death-associated protein kinase 2;Death-associated protein kinase 3                                                  | DAPK2;DAPK3          | -4.101   |
| POU domain, class 3, transcription factor 2;POU domain, class 3, transcription factor 1;POU domain, class 3, transcr | POU3F2;POU3F1;POU3F3 | -3.878   |
| 60S ribosomal protein L15                                                                                            | RPL15                | -3.808   |
| Histone H3.2                                                                                                         | HIST2H3A             | -3.304   |
| Heterogeneous nuclear ribonucleoprotein U-like protein 2                                                             | HNRNPUL2             | -3.187   |
| Tropomyosin alpha-3 chain                                                                                            | TPM3                 | -3.130   |
| 3-beta-hydroxysteroid-Delta(8),Delta(7)-isomerase                                                                    | EBP                  | -3.096   |
| Derlin-2                                                                                                             | DERL2                | -3.091   |
| Structural maintenance of chromosomes flexible hinge domain-containing protein 1                                     | SMCHD1               | -2.999   |
| Histone H1x                                                                                                          | H1FX                 | -2.955   |
| ATP synthase subunit gamma, mitochondrial                                                                            | ATP5C1               | -2.891   |
| BTB/POZ domain-containing protein KCTD16                                                                             | KCTD16               | -2.852   |
| N-terminal Xaa-Pro-Lys N-methyltransferase 1;N-terminal Xaa-Pro-Lys N-methyltransferase 1, N-terminally processed    | NTMT1                | -2.787   |
| Fibroblast growth factor 8                                                                                           | FGF8                 | -2.711   |
| Transmembrane channel-like protein 1                                                                                 | TMC1                 | -2.687   |
| Protein NipSnap homolog 1                                                                                            | NIPSNAP1             | -2.626   |
| Syntaxin-7                                                                                                           | STX7                 | -2.583   |
| Helicase POLQ-like                                                                                                   | HELQ                 | -2.487   |
| Catenin delta-1                                                                                                      | CTNND1               | -2.476   |
| ADP/ATP translocase 1                                                                                                | SLC25A4              | -2.343   |
| UDP-glucose 6-dehydrogenase                                                                                          | UGDH                 | -2.310   |
| Splicing factor 3A subunit 3                                                                                         | SF3A3                | -2.264   |
| Putative uncharacterized protein LRRC75A-AS1, mitochondrial                                                          | LRRC75A-AS1          | -2.161   |
| Protein mago nashi homolog;Protein mago nashi homolog 2                                                              | MAGOH;MAGOHB         | -2.144   |
| Splicing factor U2AF 26 kDa subunit;Splicing factor U2AF 35 kDa subunit                                              | U2AF1L4;U2AF1        | -2.118   |
| Major vault protein                                                                                                  | MVP                  | -2.077   |
| Coatomer subunit gamma-1                                                                                             | COPG1                | -2.032   |

  

| Protein names                                                                        | Gene names    | Log2-foi |
|--------------------------------------------------------------------------------------|---------------|----------|
| Protein monoglycylase TTL8                                                           | TLL8          | 4.066    |
| Transcription elongation factor A N-terminal and central domain-containing protein 2 | TCEANC2       | 3.692    |
| Inorganic pyrophosphatase                                                            | PPA1          | 3.235    |
| Proline-rich basic protein 1                                                         | PROB1         | 3.230    |
| Histone-lysine N-methyltransferase SUV420H1                                          | SUV420H1      | 3.132    |
| LM domain and actin-binding protein 1                                                | LIMA1         | 3.097    |
| Retinoic acid receptor beta                                                          | RARB          | 2.826    |
| Cystathionine beta-synthase                                                          | CBS           | 2.776    |
| ATP-dependent RNA helicase DDX19A;ATP-dependent RNA helicase DDX19B                  | DDX19A;DDX19B | 2.672    |
| AP-2 complex subunit beta                                                            | AP2B1         | 2.548    |
| Isopentenyl-diphosphate Delta-isomerase 1                                            | IDI1          | 2.476    |
| Eukaryotic translation initiation factor 3 subunit M                                 | EIF3M         | 2.471    |
| Zinc finger protein 728                                                              | ZNF728        | 2.444    |
| MICOS complex subunit MIC19                                                          | CHCHD3        | 2.286    |
| Phosphatidylinositol 5-phosphate 4-kinase type-2 alpha                               | PIP4K2A       | 2.192    |
| Prostaglandin G/H synthase 2                                                         | PTGS2         | 2.182    |
| Transmembrane protein 2                                                              | TMEM2         | 2.131    |
| Dynein heavy chain 2, axonemal                                                       | DNAH2         | 2.065    |
| Serine--tRNA ligase, cytoplasmic                                                     | SARS          | 2.020    |

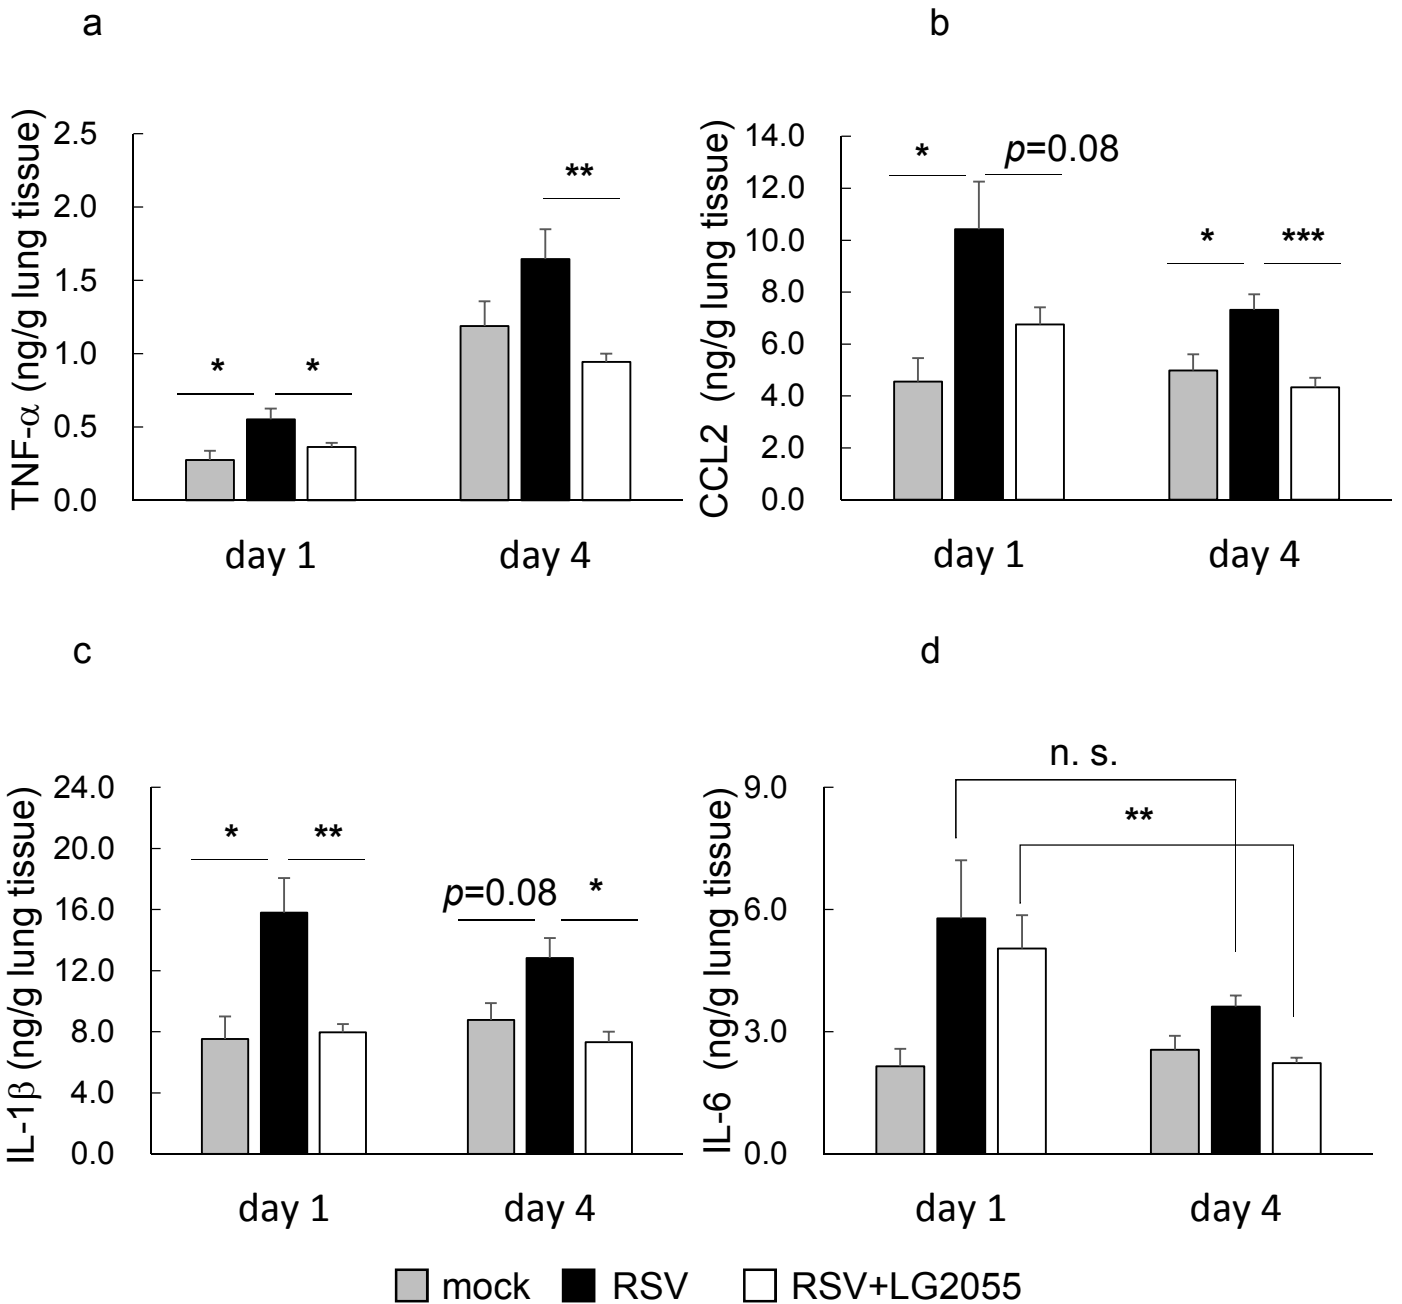

**Supplement Figure 1: Orally administered LG2055 reduced lung proinflammatory cytokines production at day1 and day4 postinfection with RSV.**

Mice were orally administered LG2055 ( $2 \times 10^9$  cfu/head/day) or 25(%) trehalose solution for 21 d, and the mice were infected RSV or not infected. day1, mock: n=5, hRSV: n=9, RSV+LG2055: n=9, and day4, mock: n=5, RSV: n=10, RSV+LG2055: n=10. (a) TNF- $\alpha$ , (b) CCL2, (c) IL-1 $\beta$ , (d) IL-6 concentration in lung homogenates were measured using ELISA. Data are presented as means + SEM. \*  $p < 0.05$ , \*\*  $p < 0.01$  and \*\*\*  $p < 0.001$  (student's  $t$  test).

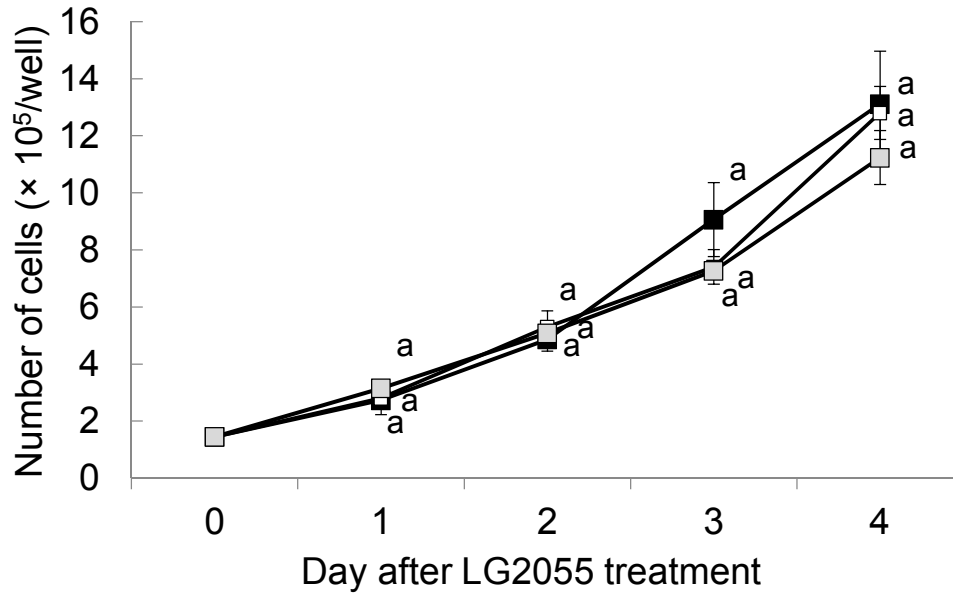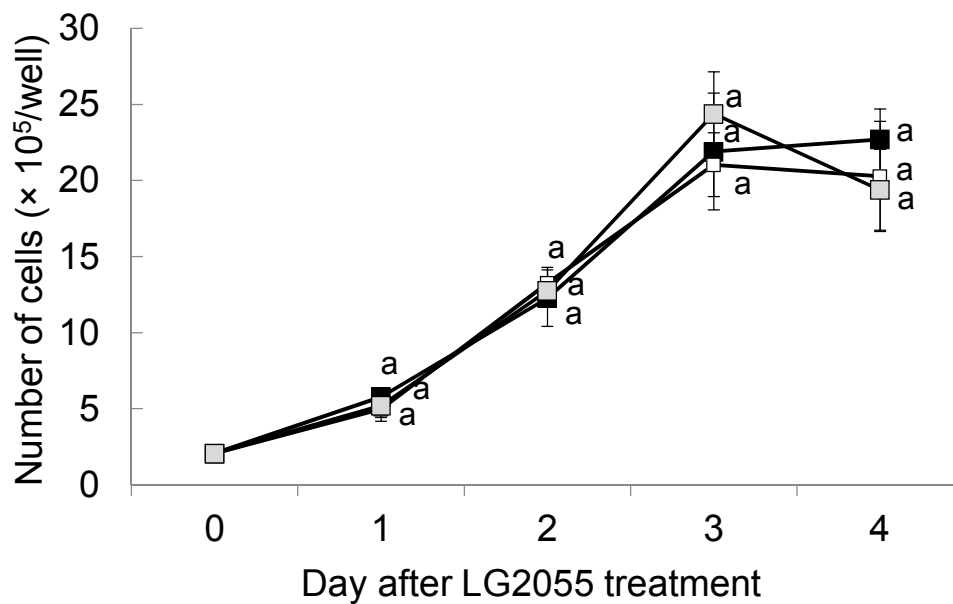

mock   
  lyophilized LG2055   
  LG2055 water soluble fraction

**Supplement figure 2: Cell growth assay with or without lyophilized LG2055**

Cells were prepared in 24-well dishes and treated with LG2055 or its soluble fraction. After 1,2,3 or 4 days incubation, each well was treated with Trypsin-EDTA (0.25%), phenol red (Thermo fisher Scientific) and the number of total cells were measured. (a) HEP-2 cell, (b) MLE12 cell. Data are presented as means  $\pm$  SD. Means with the same letter do not differ ( $P \geq 0.05$ , Tukey-kramer test).

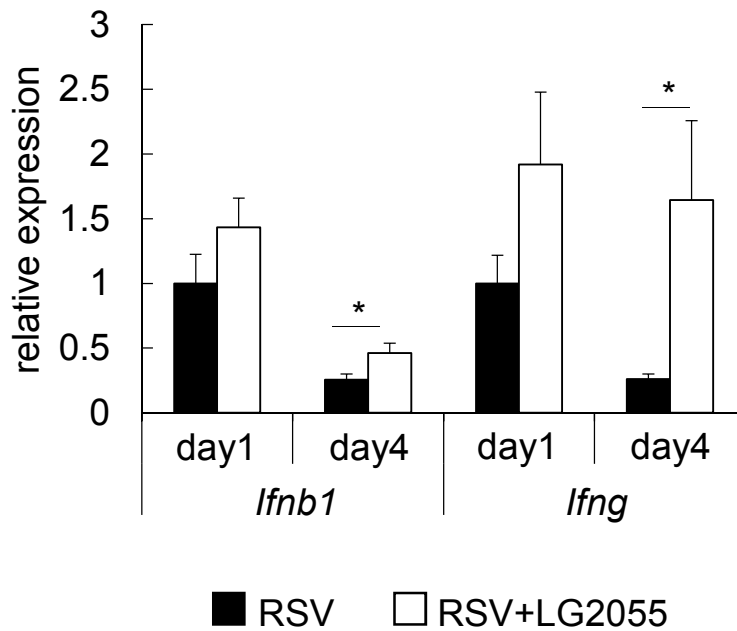

**Supplement Figure 3: IFN gene expression level in mouse lung at day 1 postinfection.** Mice were orally administered LG2055 ( $2 \times 10^9$  cfu/head/day) or a 25% trehalose solution for 21 d, and were then infected with RSV or not infected (mock: n=4, RSV: n=8 and RSV+LG2055: n=10). Gene expression in lung homogenates at day 1 postinfection was assessed by real-time PCR analysis. Data are presented as means + SEM. \*  $p < 0.05$ , \*\*  $p < 0.01$  and \*\*\*  $p < 0.001$  (student's *t* test).

Identities 9/12 (75%)  
Positives 10/12 (83%)

---

|          |    |              |    |
|----------|----|--------------|----|
| HCV NS3  | 14 | LGTIVTSLTGRD | 25 |
|          |    | L TI+TSLT RD |    |
| hRSV NS2 | 23 | LETIITSLT-RD | 33 |

---

**Supplement Figure 4: Result of alignment between HCV NS3 and hRSV NS2 by BLAST search**

Sequence homology between HCV and NS proteins of RSV was investigated by BLAST search. Sequence alignment between HCV NS3 and RSV NS2 was also assessed by BLAST search.
